# Supplementary material for: Seamlessly conductive Co(OH)2 tailored atomically dispersed Pt electrocatalyst with a hierarchical nanostructure for an efficient hydrogen evolution reaction
Source: Royal Society of Chemistry journal article supplement (doi:10.1039/d0ee01347a), 2020-01-01
Supplement: d0ee01347a1.pdf [file d0ee01347a1.pdf]

Electronic Supplementary Material (ESI) for Energy & Environmental Science.

Electronic Supplementary Information

**Seamlessly Conductive Co(OH)<sub>2</sub> Tailored Atomically Dispersed Pt  
Electrocatalyst in Hierarchical Nanostructure for Efficient Hydrogen Evolution  
Reaction**

Kai Ling Zhou,<sup>a</sup> Changhao Wang,<sup>\*a</sup> Zelin Wang,<sup>b</sup> Chang Bao Han,<sup>\*a</sup> Qianqian Zhang,<sup>a</sup> Xiaoxing Ke,<sup>b</sup> Jingbing Liu<sup>a</sup> and Hao Wang<sup>a</sup>

<sup>a</sup> College of Materials Science and Engineering, Beijing University of Technology,  
Beijing 100124, P. R. China

E-mail: cbhan@bjut.edu.cn; wangch33@bjut.edu.cn

<sup>b</sup>Institute of Microstructure and Properties of Advanced Materials, Beijing University  
of Technology, Beijing 100124, P. R. China.

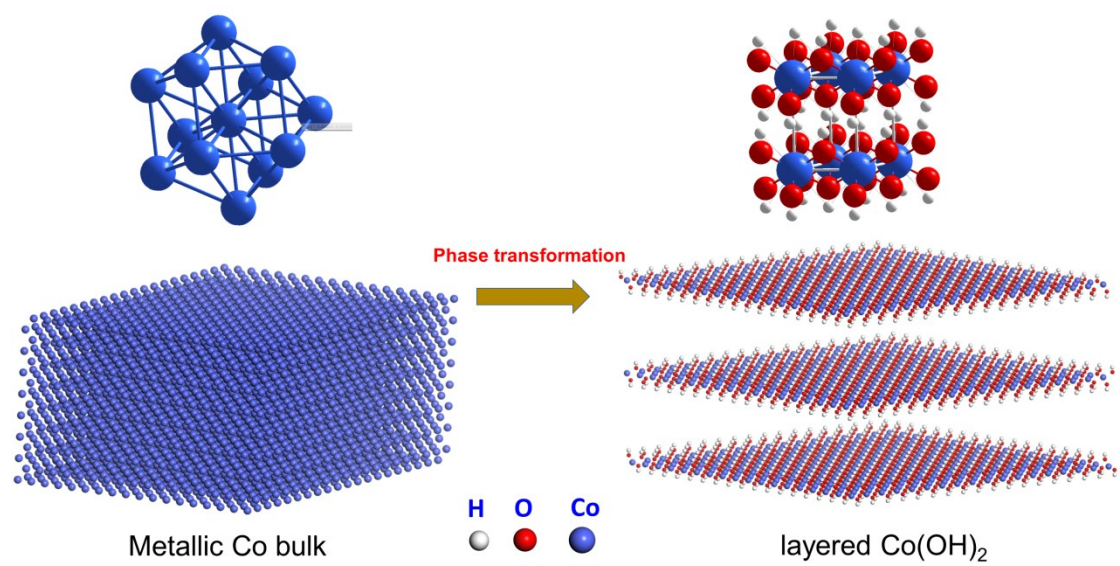

**Figure S1.** Schematic of the electrochemical phase transformation of metallic Co to layered Co(OH)<sub>2</sub>.

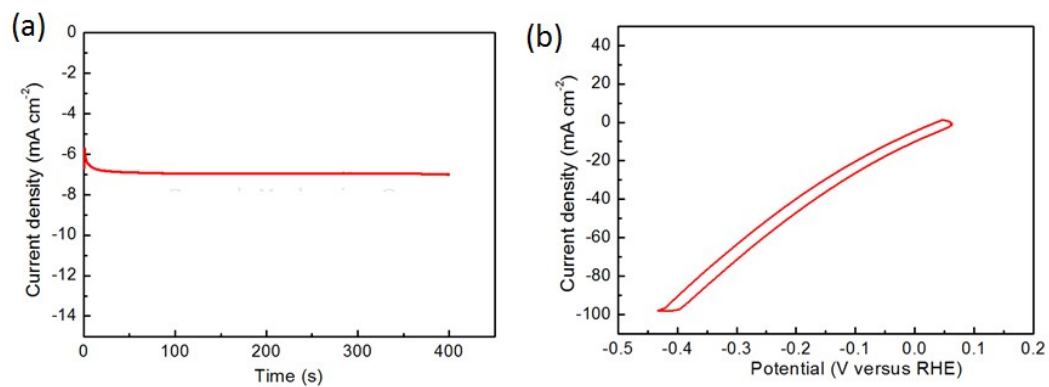

**Figure S2.** (a) The electrochemical deposition curve of metallic Co on Ag NWs templates and (b) one CV curve chosen from 3000 CV cycles for single-atom Pt immobilization and phase transformation of metallic Co to  $\text{Co(OH)}_2$  on Ag NWs.

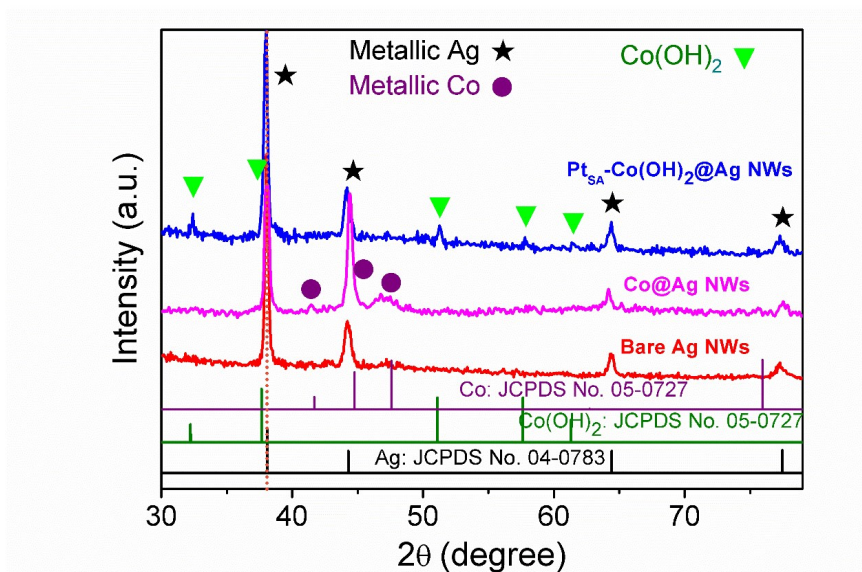

**Figure S3.** The X-ray diffraction (XRD) patterns of Pt<sub>SA</sub>-Co(OH)<sub>2</sub>@Ag NWs, Co@Ag NWs and Ag NWs.

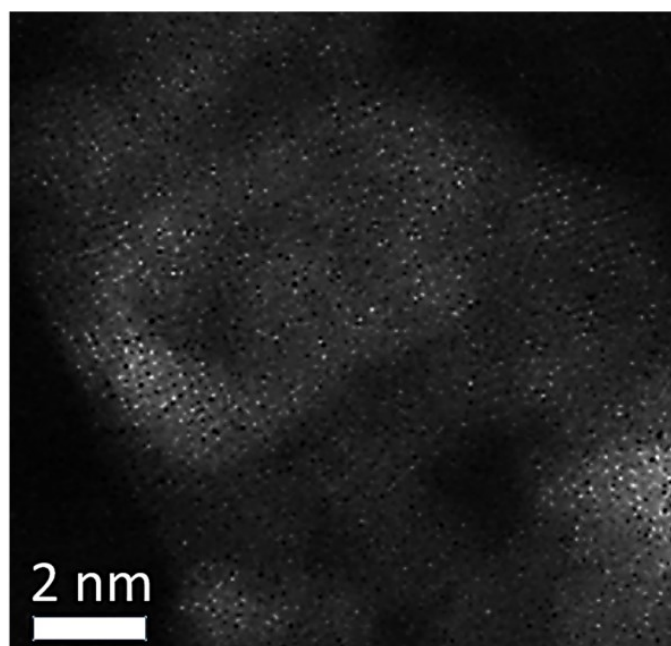

**Figure S4.** The aberration-corrected high-angle annular dark-field scanning TEM (HAADF-STEM) images of Pt<sub>SA</sub>-Co(OH)<sub>2</sub> nanosheets.

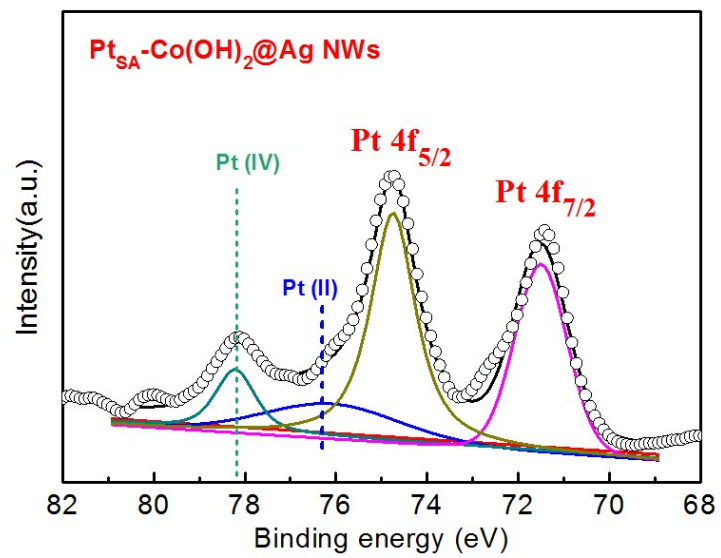

**Figure S5.** The Pt XPS fitting curve of Pt<sub>SA</sub>-Co(OH)<sub>2</sub>@Ag NWs.

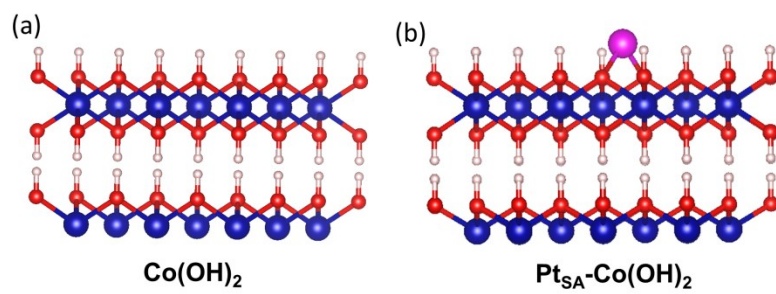

**Figure S6.** Computational models of (a)  $\text{Co(OH)}_2$  and (b)  $\text{Pt}_{\text{SA}}\text{-Co(OH)}_2$ . H, white ball; Co, blue ball; O, red ball; Pt, pink ball.

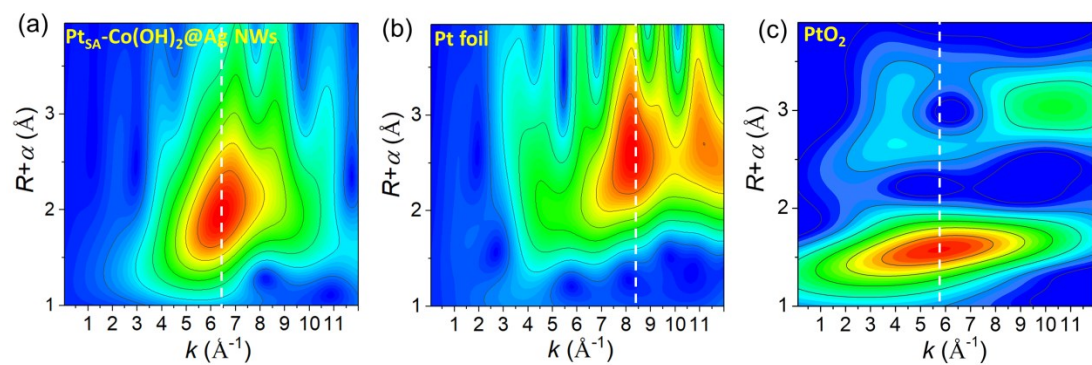

**Figure S7.** Wavelet transform (WT) of (a)  $\text{Pt}_{\text{SA}}\text{-Co(OH)}_2\text{@Ag}$  NWs, (b) Pt foil, and (c)  $\text{PtO}_2$ .



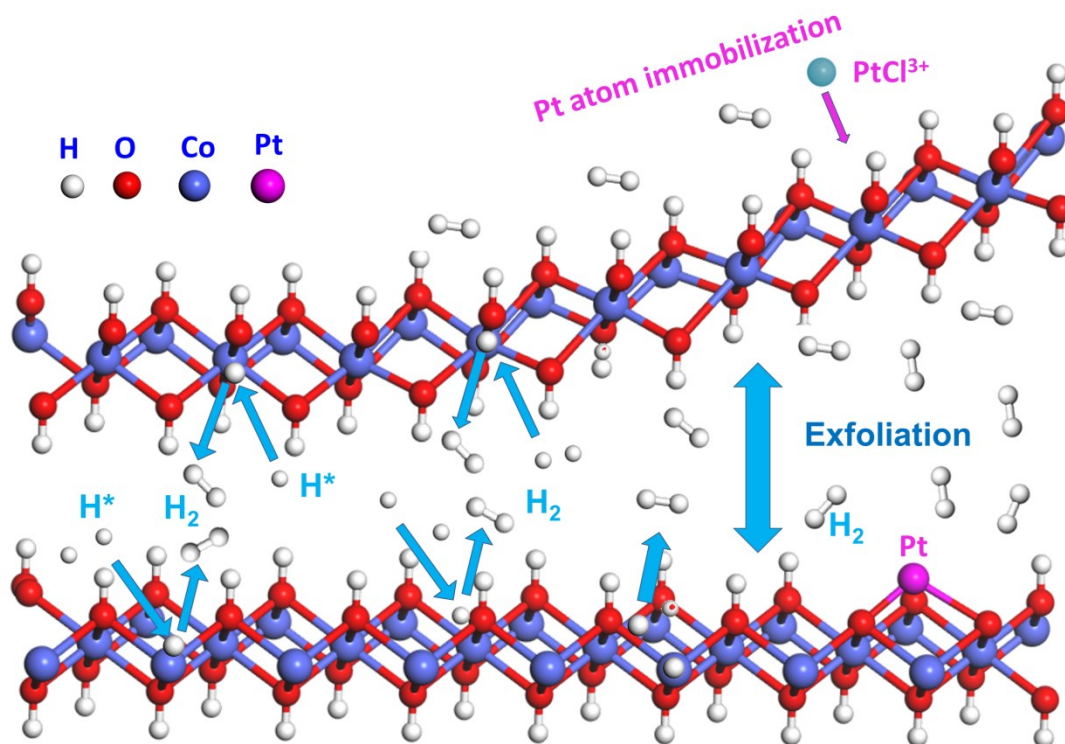

**Figure S8.** Illustration of the possible mechanism of single-atom Pt immobilization and electrochemical exfoliation of Co(OH)<sub>2</sub> nanosheets during HER process.

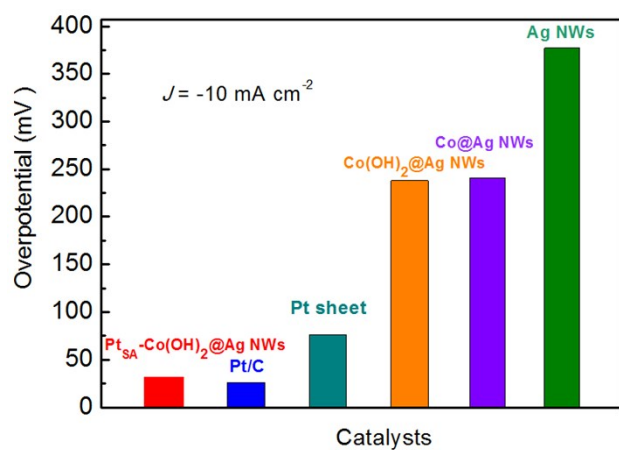

**Figure S9.** The overpotentials of different catalysts required to deliver a current density of  $J = -10 \text{ mA cm}^{-2}$ .

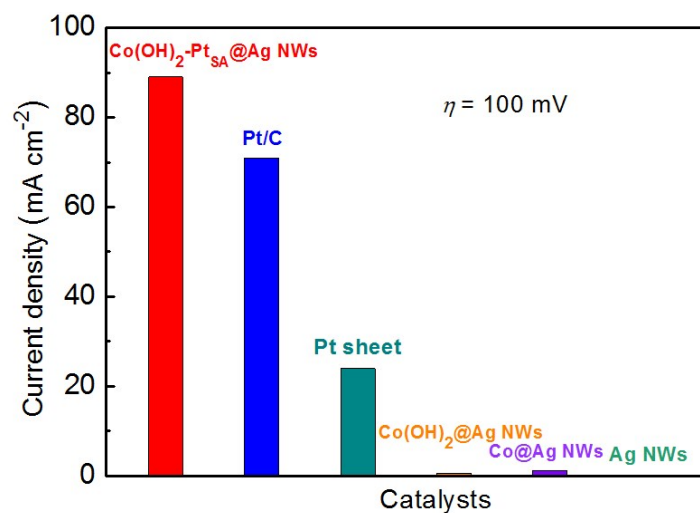

**Figure S10.** The corresponding current densities of different catalysts at the overpotential of  $\eta = 100$  mV.

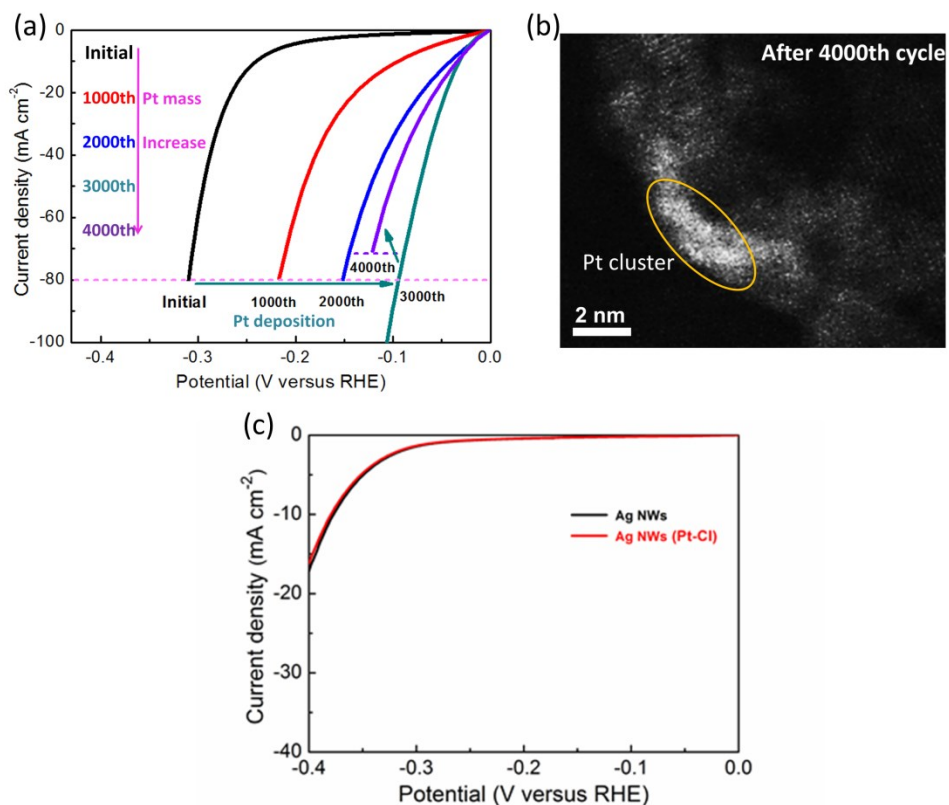

**Figure S11.** (a) The HER polarization curves of the sample at the different electrochemical scan cycles during the fabrication process of the single-atom Pt anchored  $\text{Co}(\text{OH})_2$ . (b) Atomic-resolution HAADF-STEM image of the sample after 4000 cycles. (c) The HER polarization curves of bare Ag NWs electrode and the Ag NWs electrode containing Pt-Cl coordinations.

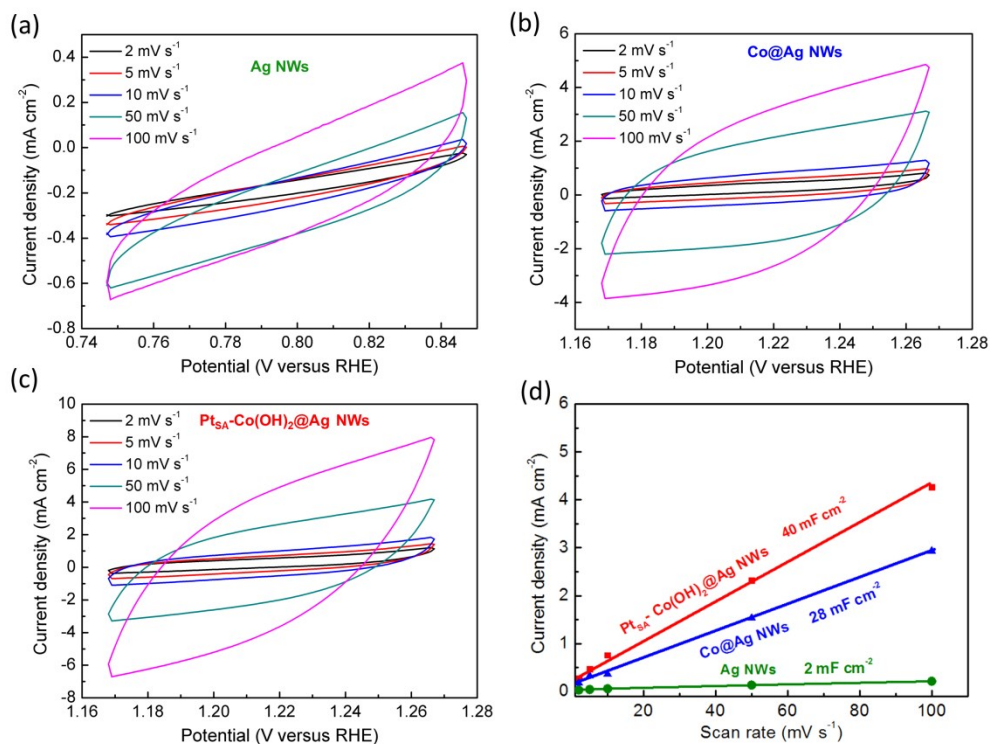

**Figure S12.** Cyclic voltammograms curves with different scan rates for electrochemical capacitance measurements of (a) Ag NWs, (b) Co@Ag NWs, (c) Pt<sub>SA</sub>-Co(OH)<sub>2</sub>@Ag NWs and (d) The double-layer capacitance ( $C_{dl}$ ) of the catalysts.

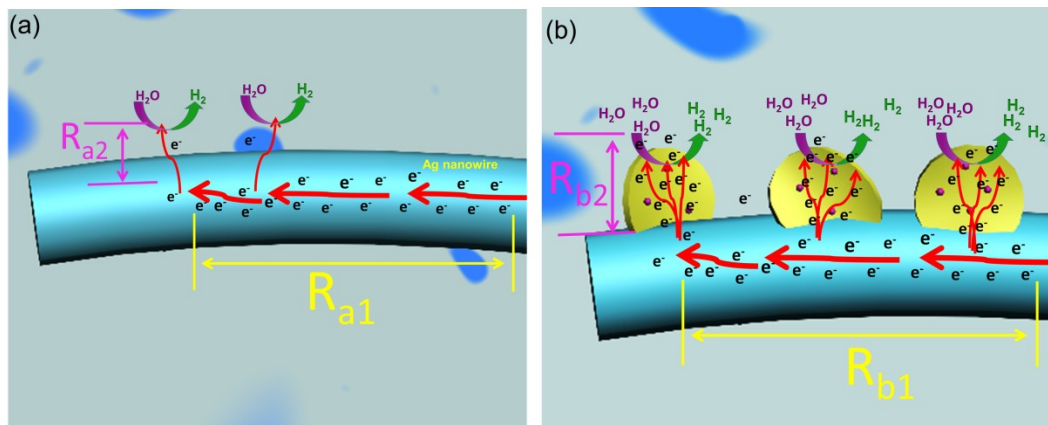

**Figure S13.** The illustration of electrons transport through (a) Ag NWs and (b) Pt<sub>SA</sub>-Co(OH)<sub>2</sub>@Ag NW during HER process.

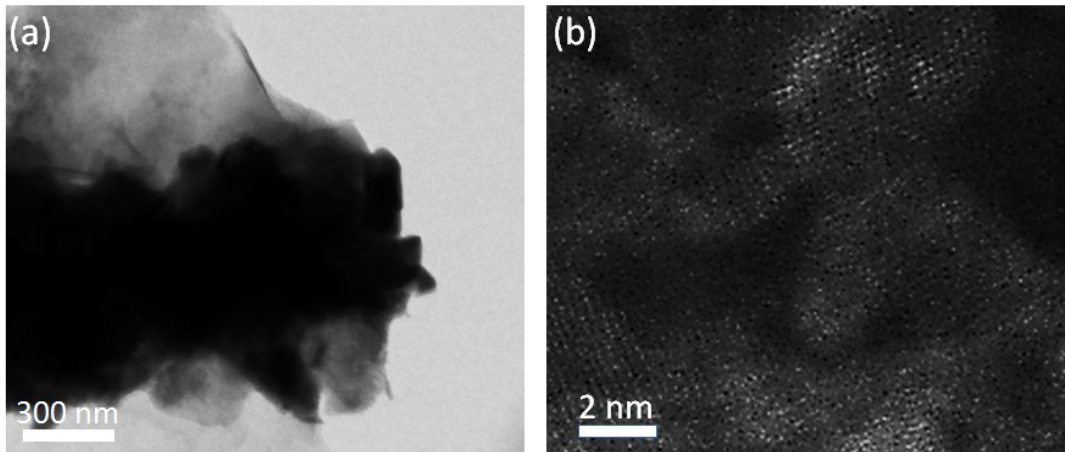

**Figure S14.** (a) TEM image and (b) HAADF-STEM images of  $\text{Pt}_{\text{SA}}\text{-Co(OH)}_2\text{@Ag}$  NWs after durability testing.

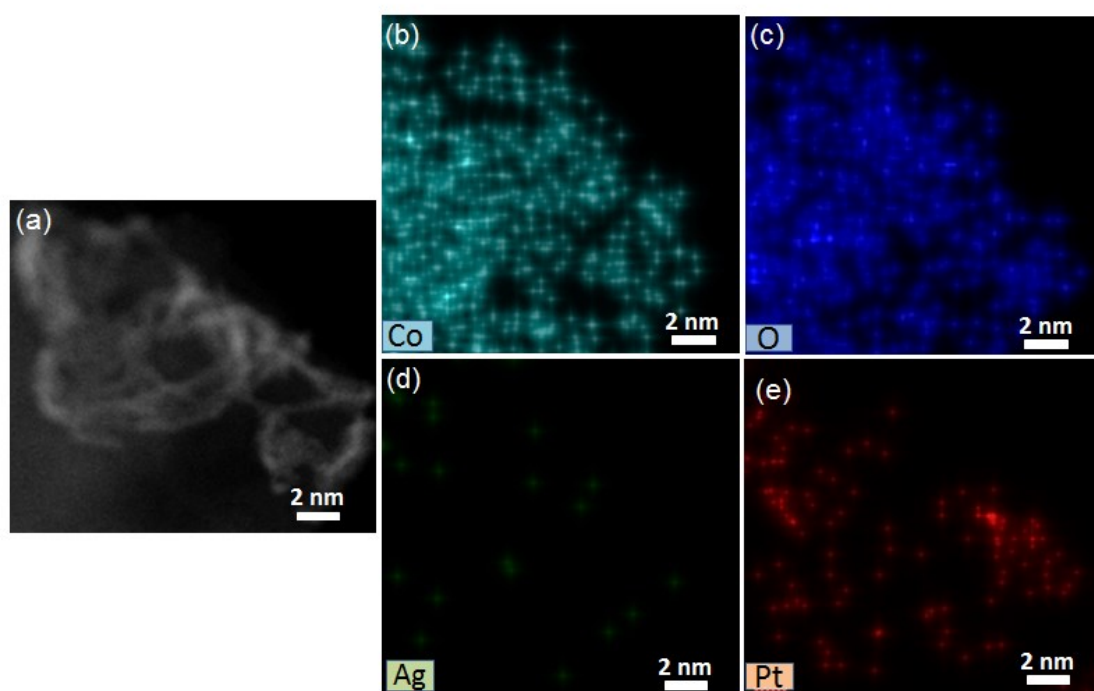

**Figure S15.** (a) HAADA-STEM images and (b-e) corresponding elemental mapping of Co, O, Ag, Pt of  $\text{Pt}_{\text{SA}}\text{-Co(OH)}_2\text{@Ag}$  NWs after durability testing.



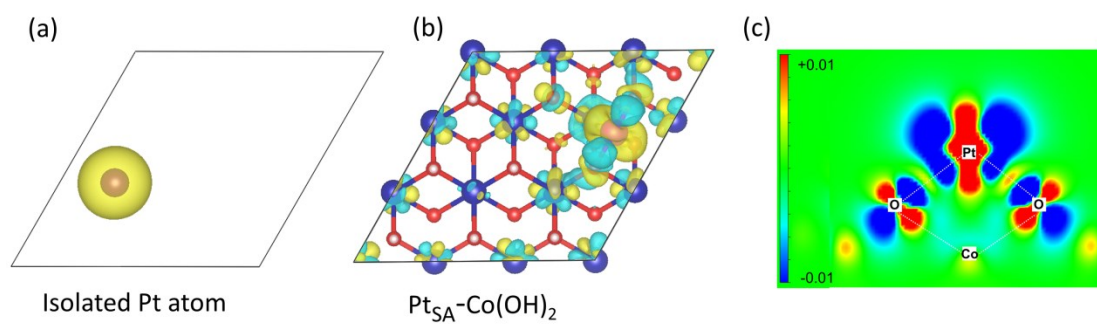

**Figure S16.** (a) Top view of the electronic charge density distribution of isolated Pt atom. (b) Calculated electron density difference of Pt atom in  $\text{Pt}_{\text{SA}}\text{-Co(OH)}_2$ . (c) Two-dimensional isosurface map on the cross-section of the Pt, O and O atoms in  $\text{Pt}_{\text{SA}}\text{-Co(OH)}_2$ , and the unit of electron density is  $e/\text{\AA}^3$ .

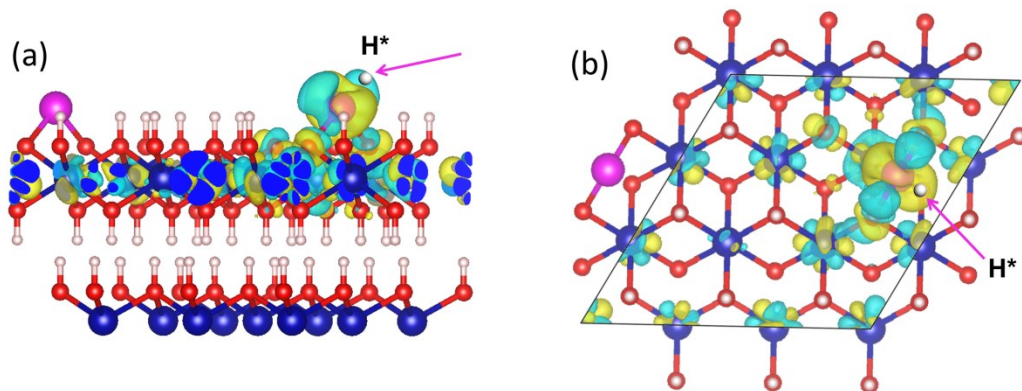

**Figure S17.** The charge density distribution of the Pt<sub>SA</sub>-Co(OH)<sub>2</sub> and hydrogen adsorption location on the Pt atom. (a) The side view and (b) top view.

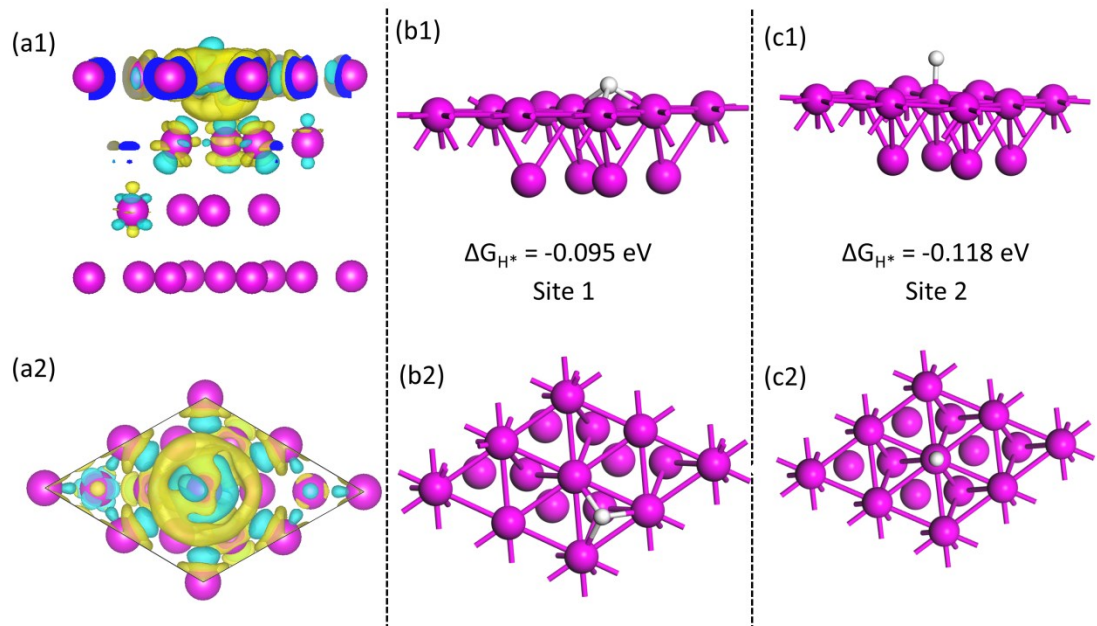

**Figure S18.** The calculated charge density distribution of the bulk Pt and hydrogen adsorption locations.

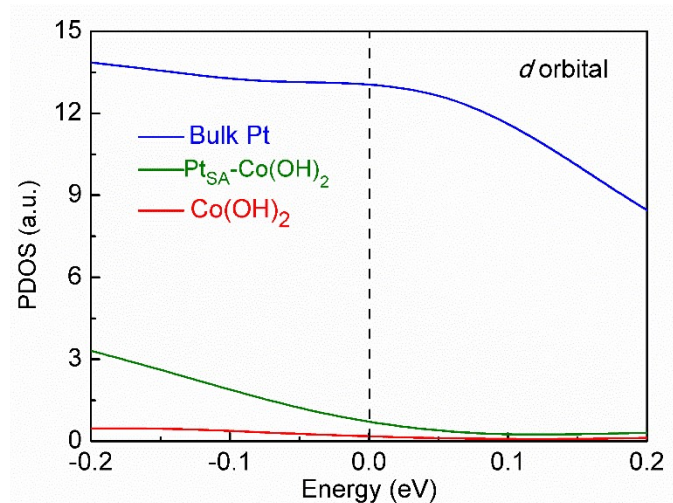

**Figure S19.** Calculated PDOS of Co(OH)<sub>2</sub>, Pt<sub>SA</sub>-Co(OH)<sub>2</sub> and bulk Pt between -0.5 eV ~ 0.5 eV.

**Table S1.** EXAFS fitting results of Pt<sub>SA</sub>-Co(OH)<sub>2</sub>@Ag NWs. Pt foil was used as a reference.

|                                                       | Shell  | CN      | $R(\text{\AA})$ | $\sigma^2$ | $\Delta E_0$ | $R$<br>factor |
|-------------------------------------------------------|--------|---------|-----------------|------------|--------------|---------------|
| Pt foil                                               | Pt-Pt  | 12      | 2.76±0.01       | 0.0042     | 8.2±0.5      | 0.0015        |
| Pt <sub>SA</sub> -<br>Co(OH) <sub>2</sub> @<br>Ag NWs | Pt-O   | 2.1±0.4 | 1.95±0.04       | 0.0030     | 10.2±4.3     | 0.0140        |
|                                                       | Pt-Cl1 | 2.5±0.3 | 2.32±0.02       | 0.0030     |              |               |
|                                                       | Pt-Cl2 | 2.9±0.5 | 2.74±0.02       |            |              |               |

<sup>a</sup> $N$ : coordination numbers; <sup>b</sup> $R$ : bond distance; <sup>c</sup> $\sigma^2$ : Debye-Waller factors; <sup>d</sup>  $\Delta E_0$ : the inner potential correction.  $R$  factor: goodness of fit.  $S_0^2$  was set to 0.78, according to the experimental EXAFS fit of Pt foil reference by fixing CN as the known crystallographic value.

**Table S2.** Comparison of HER performances for Pt<sub>SA</sub>-Co(OH)<sub>2</sub>@Ag NWs with other reported single-atom metal HER catalysts.

|    | Electrocatalysts                                                  | Electrolyte                          | Electrode binder | Overpotential at 10 mA cm <sup>-2</sup> (mV) | Tafel slop (mV dec <sup>-1</sup> ) | Charge transfer resistance ( $R_{ct}$ , $\Omega$ ) | Reference                                         |
|----|-------------------------------------------------------------------|--------------------------------------|------------------|----------------------------------------------|------------------------------------|----------------------------------------------------|---------------------------------------------------|
| 1  | Pt <sub>SA</sub> -Co(OH) <sub>2</sub> @Ag NWs                     | 1 M KOH                              | Self-supporting  | 29                                           | 35.7                               | 0.7                                                | This work                                         |
| 2  | Mo <sub>2</sub> TiC <sub>2</sub> T <sub>x</sub> -Pt <sub>SA</sub> | 0.5 M H <sub>2</sub> SO <sub>4</sub> | Nafion           | 30                                           | 30                                 | 8.5                                                | Nat. Catal., <b>2018</b> , 1, 985.                |
| 3  | Pt <sub>SA</sub> /OLC                                             | 0.5 M H <sub>2</sub> SO <sub>4</sub> | Nafion           | 38                                           | 36                                 | 6.88                                               | Nat. Energy, <b>2019</b> , 4, 512.                |
| 4  | Pt/MWCNTs                                                         | 0.5 M H <sub>2</sub> SO <sub>4</sub> | Nafion           | 43.9                                         | 30                                 | 8                                                  | Nano Energy, <b>2019</b> , 63, 1038.              |
| 5  | Pt-MoS <sub>2</sub>                                               | 0.1 M H <sub>2</sub> SO <sub>4</sub> | Nafion           | 60                                           | 96                                 | -                                                  | Energy Environ. Sci., <b>2015</b> , 8, 1594.      |
| 6  | er-WS <sub>2</sub> -Pt                                            | 0.5 M H <sub>2</sub> SO <sub>4</sub> | Nafion           | 40                                           | 27                                 | 25                                                 | Adv. Mater., <b>2017</b> , 1704779.               |
| 7  | Pt@PCM                                                            | 0.5 M H <sub>2</sub> SO <sub>4</sub> | Nafion           | 105                                          | 63.7                               | -                                                  | Sci. Adv., <b>2018</b> , 4, 6657.                 |
| 8  | Ru-MoS <sub>2</sub> /CC                                           | 1.0 M KOH                            | Self-supporting  | 41                                           | 114                                | -                                                  | Appl. Catal., B, <b>2019</b> , 249, 91.           |
| 9  | Pt SA/m-WO <sub>3-x</sub>                                         | 0.5 M H <sub>2</sub> SO <sub>4</sub> | Nafion           | 38                                           | 45                                 | -                                                  | Angew. Chem., Int. Ed., <b>2019</b> , 131, 16184. |
| 10 | PtSA/S-C                                                          | 0.5 M H <sub>2</sub> SO <sub>4</sub> | Nafion           | 53                                           | 46.92                              | 28                                                 | Nat. Commun., <b>2019</b> , 10, 1.                |
| 11 | Ru, N-C NWs                                                       | 0.1 M H <sub>2</sub> SO <sub>4</sub> | Nafion           | 47                                           | 14                                 | 20.7                                               | Nat. Commun., <b>2019</b> , 10, 1.                |
| 12 | Pd-Graphdiyne                                                     | 0.5 M H <sub>2</sub> SO <sub>4</sub> | Self-supporting  | 55                                           | 47                                 | 4.55                                               | iScience, <b>2019</b> , 11, 31.                   |
| 13 | PtN <sub>x</sub> /TiO <sub>2</sub>                                | 0.5 M H <sub>2</sub> SO <sub>4</sub> | Nafion           | 67                                           | 34                                 | -                                                  | Nano Energy, <b>2020</b> , 73, 104739             |
| 14 | RuP <sub>2</sub> @NPC                                             | 0.5 M H <sub>2</sub> SO <sub>4</sub> | Nafion           | 38                                           | 38                                 | 2000                                               | Angew. Chem., Int. Ed., <b>2017</b> ,             |

|  |  |  |  |  |  |  |            |
|--|--|--|--|--|--|--|------------|
|  |  |  |  |  |  |  | 56, 11559. |
|--|--|--|--|--|--|--|------------|
